# Supplementary material for: Conformational and hydration properties modulate ice recognition by type I antifreeze protein and its mutants
Source: Royal Society of Chemistry journal article supplement (doi:10.1039/c7cp00221a), 2017-01-01
Supplement: c7cp00221a1.pdf [file c7cp00221a1.pdf]

**Supplementary material**

**Conformational and Hydration Properties Modulate the Ice Recognition by  
Type I Antifreeze Protein and its Mutants**

Sandipan chakraborty, Biman Jana\*

Department of Physical Chemistry, Indian Association for the Cultivation of Science, Jadavpur,  
Kolkata-700032

\*Corresponding author:

Dr. Biman Jana: Department of Physical chemistry, IACS, Kolkata-700032, India.

Phone: +91 33 2473 4971; Fax: +91 33 2473 2805; E-mail: [pcbj@iacs.res.in](mailto:pcbj@iacs.res.in)

**HPLC6**

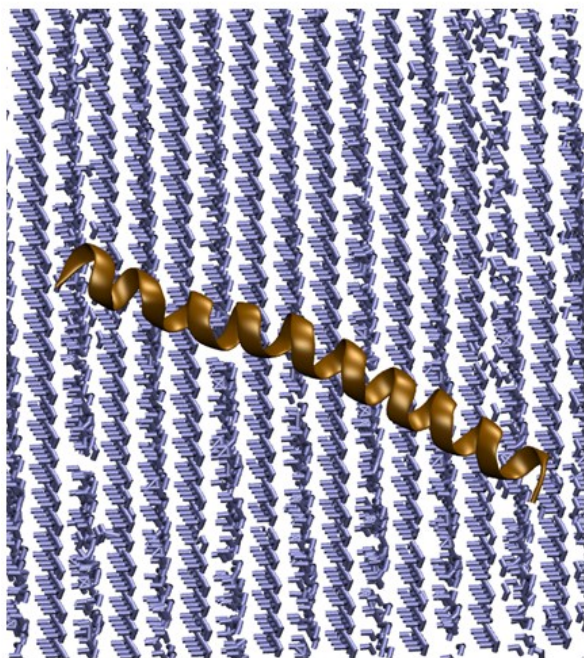

**Valine mutant**

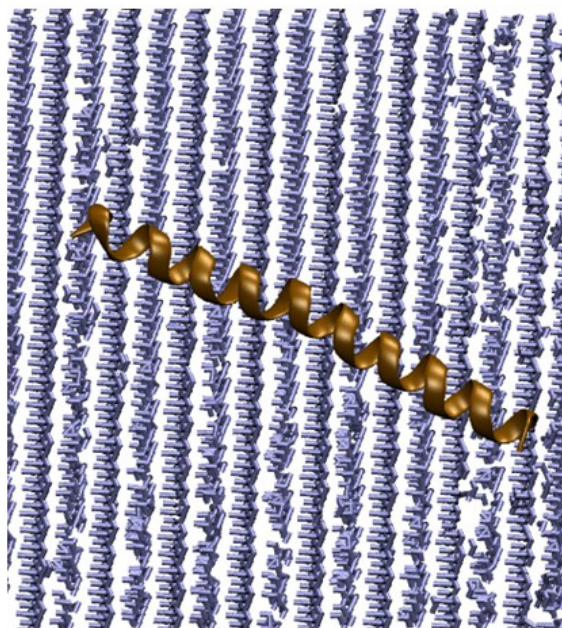

**Fig. S1:** Top view image of the bound wild type *wf*AFP (left panel) and its valine mutant (right panel) on the  $[2\ 0\ 2\ 1]$  pyramidal plane is shown. Ice surface is shown in ice-blue stick mode while the bound AFP is shown in cartoon representation (brown color).
